# Supplementary material for: Intracellular detection of hazardous Cd2+ through a fluorescence imaging technique by using a nontoxic coumarin based sensor
Source: Royal Society of Chemistry journal article supplement (doi:10.1039/c6dt04833a), 2017-01-01
Supplement: c6dt04833a1.pdf [file c6dt04833a1.pdf]

## **Intracellular detection of hazardous Cd<sup>2+</sup> through fluorescence imaging technique by a nontoxic coumarin based sensor**

Chanda Kumari,<sup>a</sup> Dibyendu Sain,<sup>a,b</sup> Ashish Kumar,<sup>a</sup> Sushanta Debnath,<sup>c</sup> Partha Saha<sup>c</sup> and Swapan Dey<sup>\*a</sup>

| <b>Table of content</b>                                                                 | <b>Page No.</b> |
|-----------------------------------------------------------------------------------------|-----------------|
| <b>Crystal structure and Crystallographic data for R1</b>                               | <b>2</b>        |
| <b><sup>1</sup>H NMR, <sup>13</sup>C NMR, mass and IR spectra of R1 and its complex</b> | <b>3-10</b>     |
| <b>Calculation of limit of detection (LOD)</b>                                          | <b>11</b>       |
| <b>Association constant calculation by fluorescence titration</b>                       | <b>12</b>       |
| <b>Quantum yield calculation</b>                                                        | <b>13</b>       |

**Table S1: Crystallographic data for R1**

|                                             |                                                               |
|---------------------------------------------|---------------------------------------------------------------|
| CCDC No                                     | 1524036                                                       |
| Empirical formula                           | C <sub>38</sub> H <sub>37</sub> N <sub>3</sub> O <sub>4</sub> |
| Formula weight                              | 599.70                                                        |
| Temperature/K                               | 296(2)                                                        |
| Crystal system                              | triclinic                                                     |
| Space group                                 | P-1                                                           |
| a/Å                                         | 9.6575(3)                                                     |
| b/Å                                         | 12.1006(4)                                                    |
| c/Å                                         | 15.5767(5)                                                    |
| α/°                                         | 108.837(2)                                                    |
| β/°                                         | 92.772(2)                                                     |
| γ/°                                         | 94.376(2)                                                     |
| Volume/Å <sup>3</sup>                       | 1712.65(10)                                                   |
| Z                                           | 2                                                             |
| ρ <sub>calc</sub> /g/cm <sup>3</sup>        | 1.163                                                         |
| μ/mm <sup>-1</sup>                          | 0.076                                                         |
| F(000)                                      | 636.0                                                         |
| Crystal size/mm <sup>3</sup>                | ? × ? × ?                                                     |
| Radiation                                   | MoKα (λ = 0.71073)                                            |
| 2θ range for data collection/°              | 3.574 to 56.624                                               |
| Index ranges                                | -12 ≤ h ≤ 12, -16 ≤ k ≤ 16, -20 ≤ l ≤ 20                      |
| Reflections collected                       | 31919                                                         |
| Independent reflections                     | 8465 [R <sub>int</sub> = 0.0336, R <sub>sigma</sub> = 0.0343] |
| Data/restraints/parameters                  | 8465/0/406                                                    |
| Goodness-of-fit on F <sup>2</sup>           | 1.097                                                         |
| Final R indexes [I ≥ 2σ (I)]                | R <sub>1</sub> = 0.0650, wR <sub>2</sub> = 0.1848             |
| Final R indexes [all data]                  | R <sub>1</sub> = 0.1040, wR <sub>2</sub> = 0.2055             |
| Largest diff. peak/hole / e Å <sup>-3</sup> | 0.66/-0.28                                                    |

**<sup>1</sup>H-NMR (400 MHz, CDCl<sub>3</sub>) spectra of compound 1**

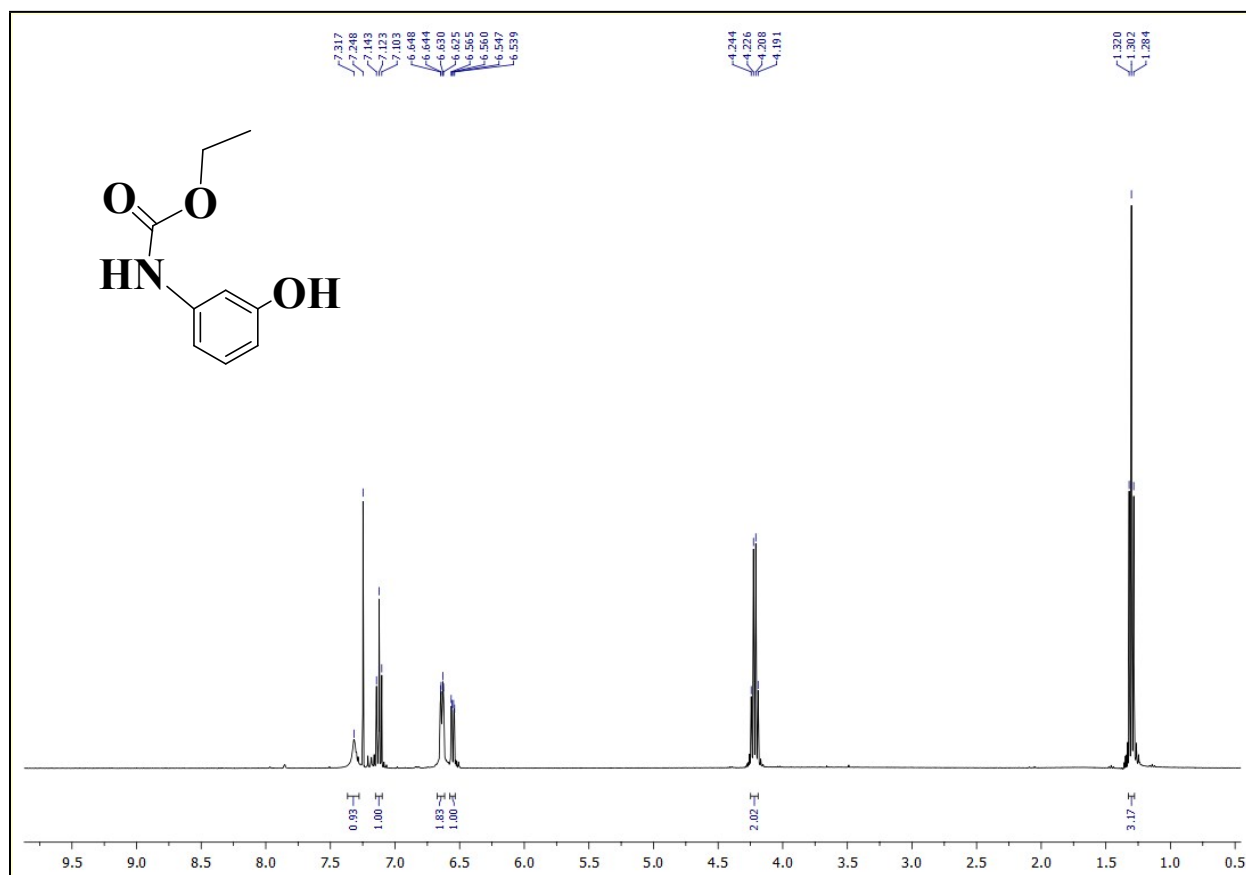

**<sup>1</sup>H-NMR (400 MHz, CDCl<sub>3</sub>) spectra of compound 2**

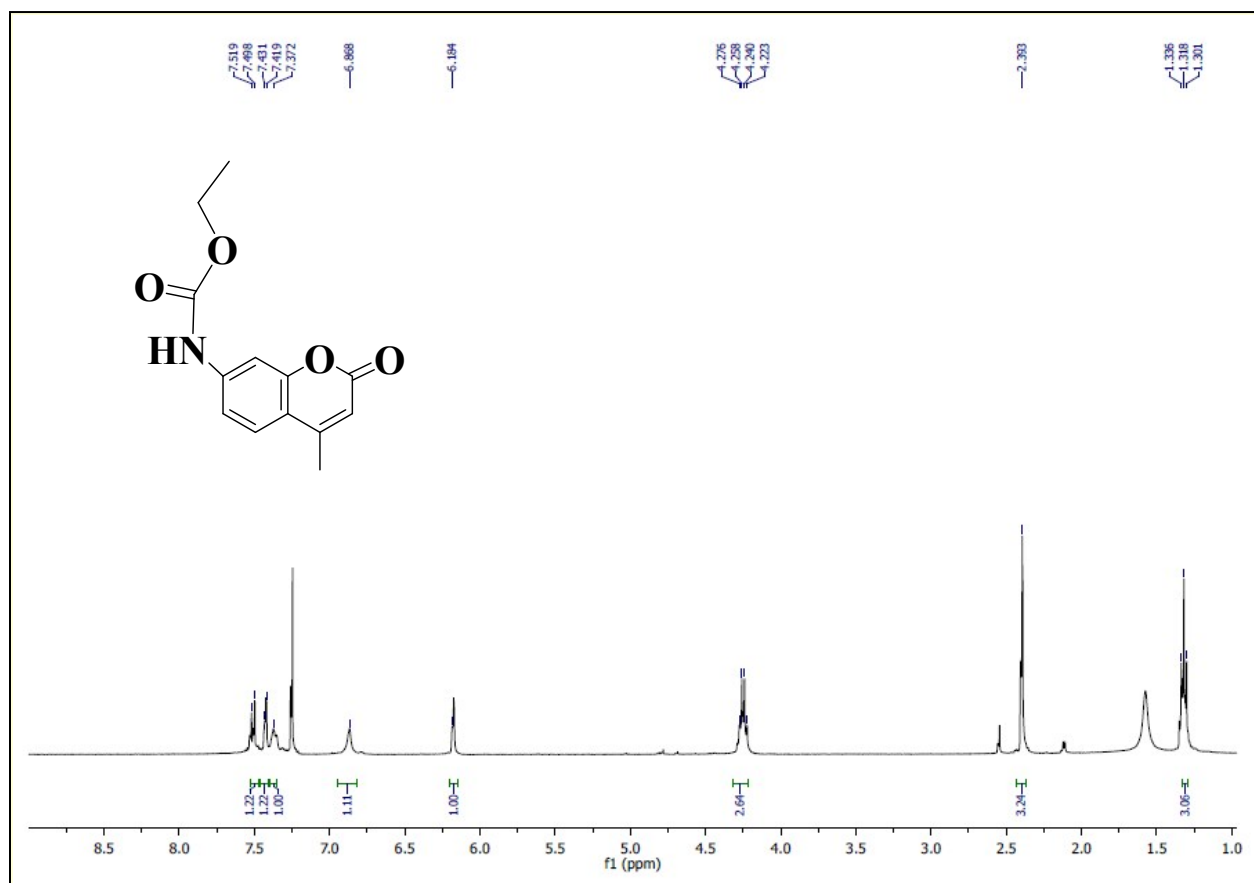

**<sup>1</sup>H-NMR (400 MHz, CDCl<sub>3</sub>) spectra of compound 3**

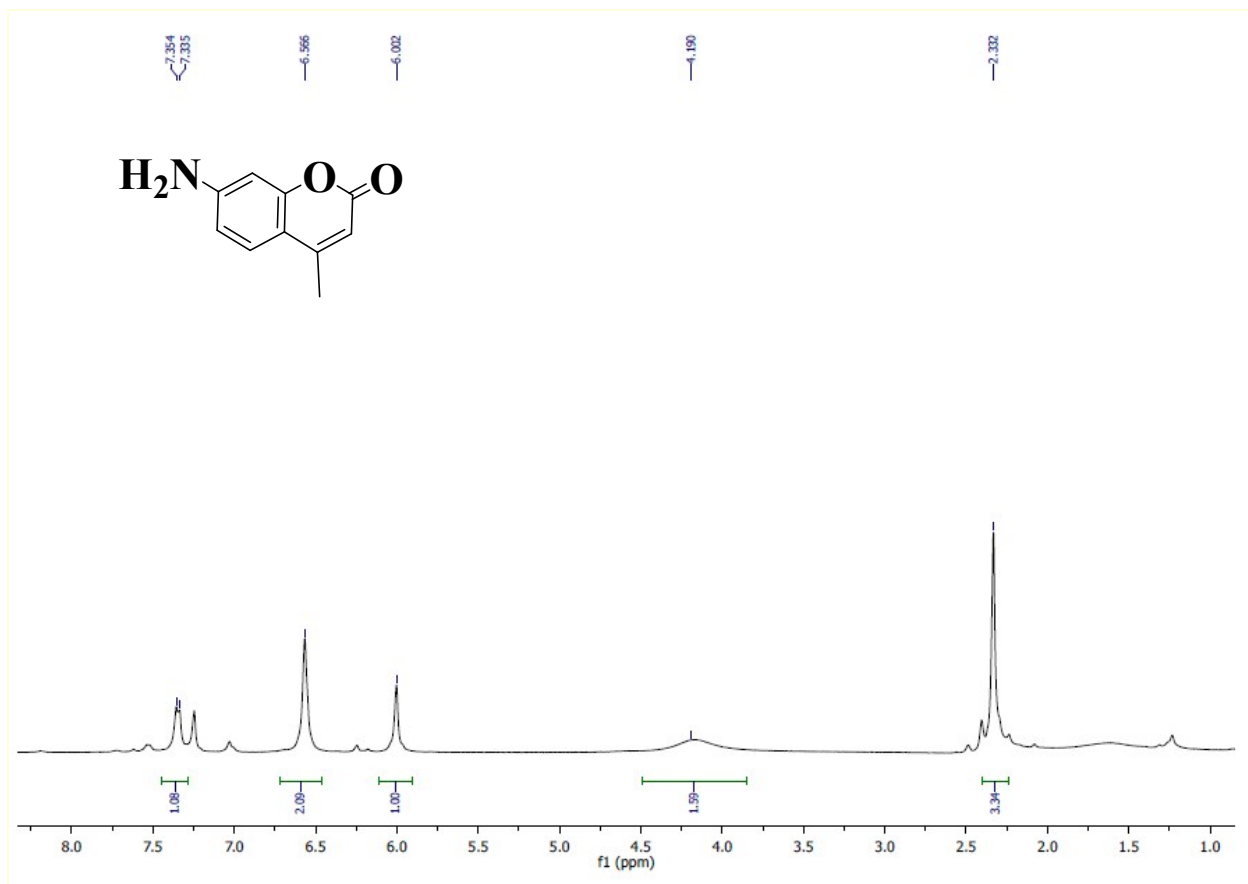

**<sup>1</sup>H-NMR (400 MHz, CDCl<sub>3</sub>) spectra of R1**

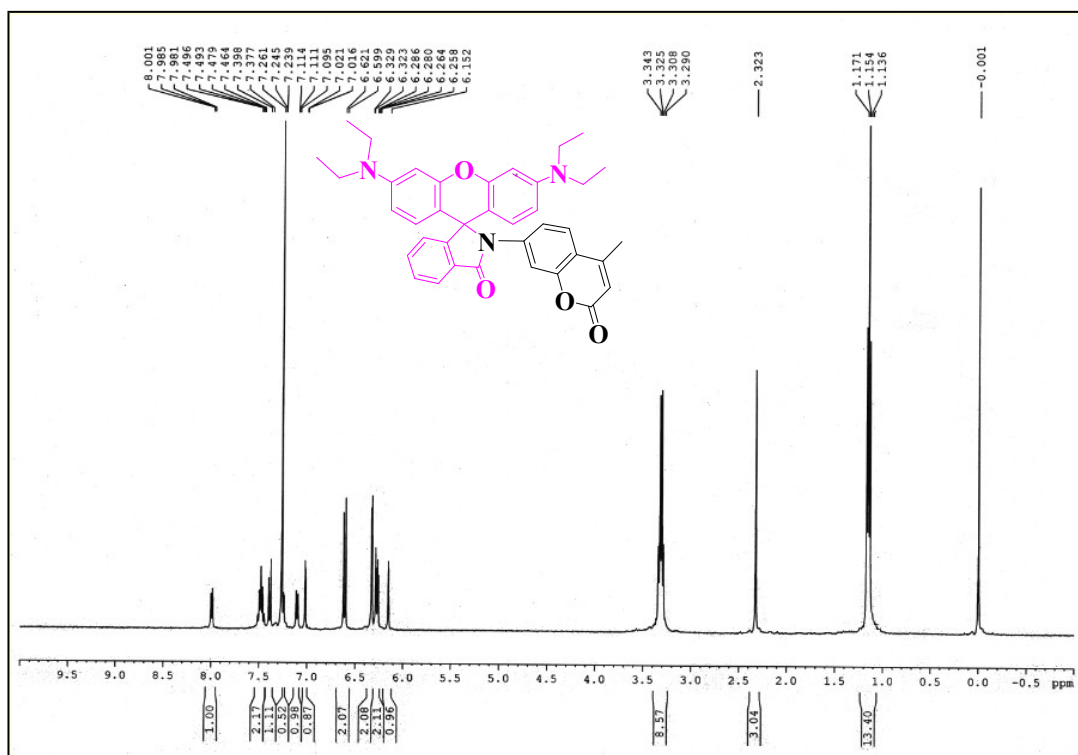

**<sup>13</sup>C-NMR (400 MHz, CDCl<sub>3</sub>) spectrum of R1**

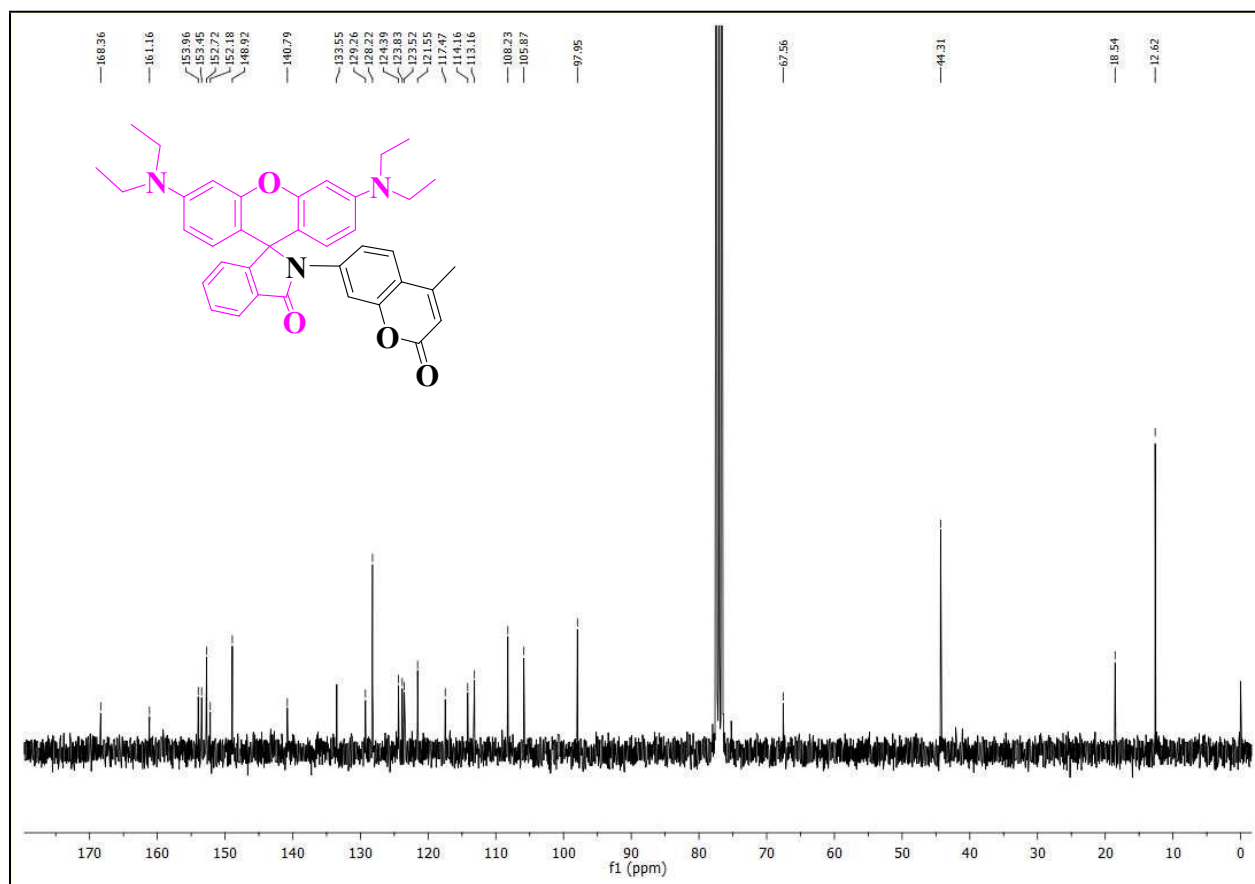

# IR spectrum of R1

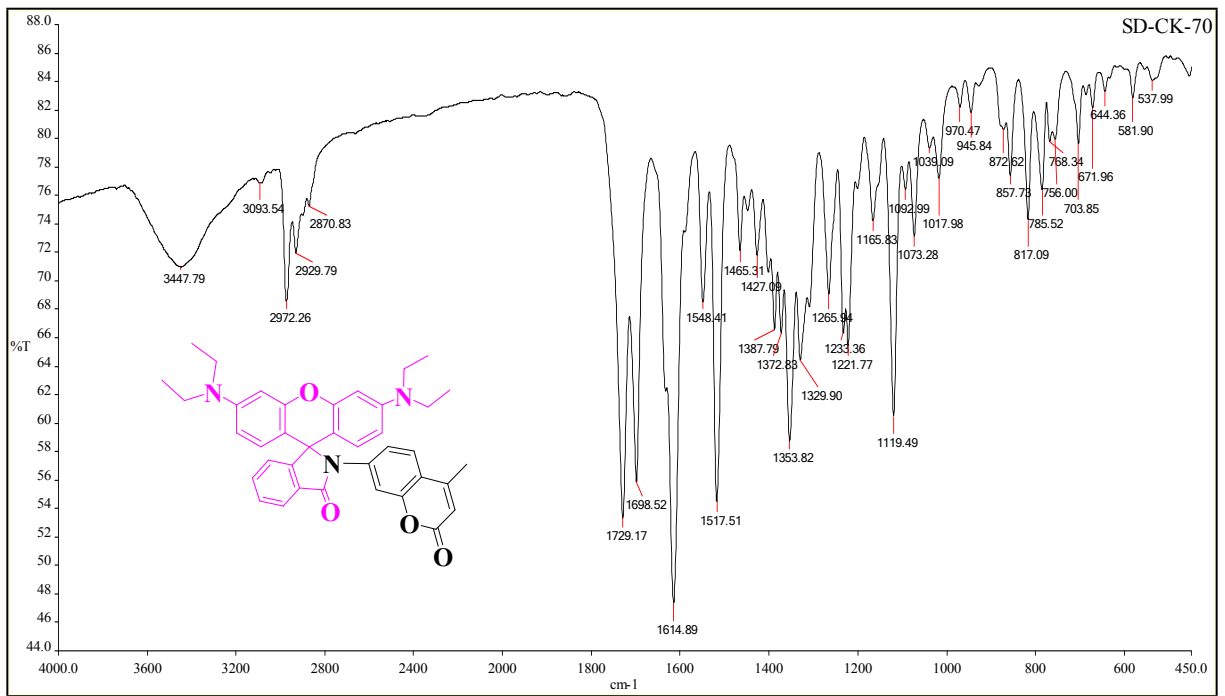



# Mass spectrum of R1:

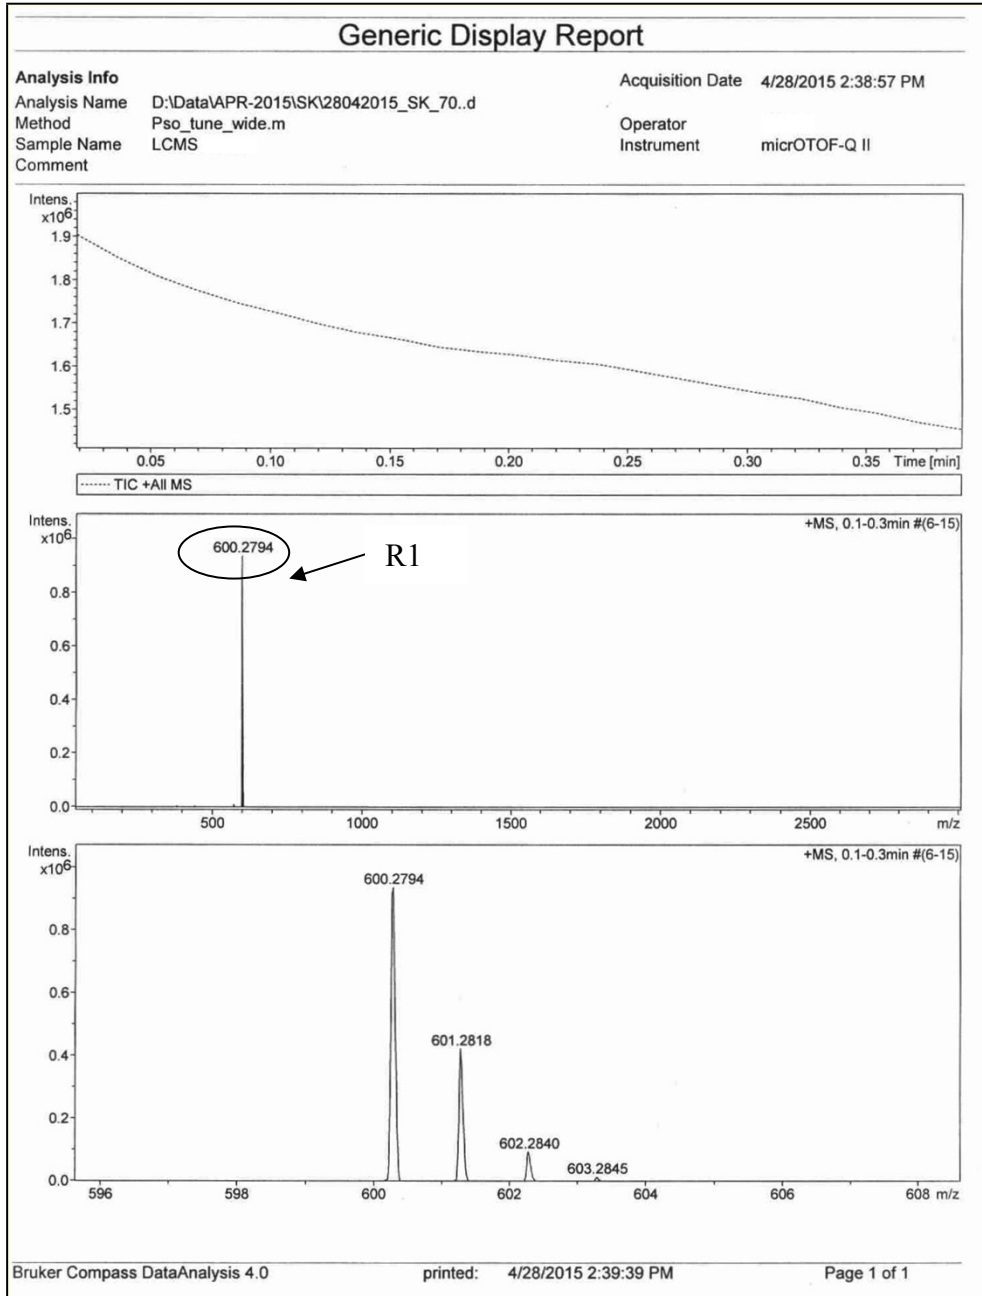

# Mass spectrum of R1+ Cd<sup>2+</sup>:

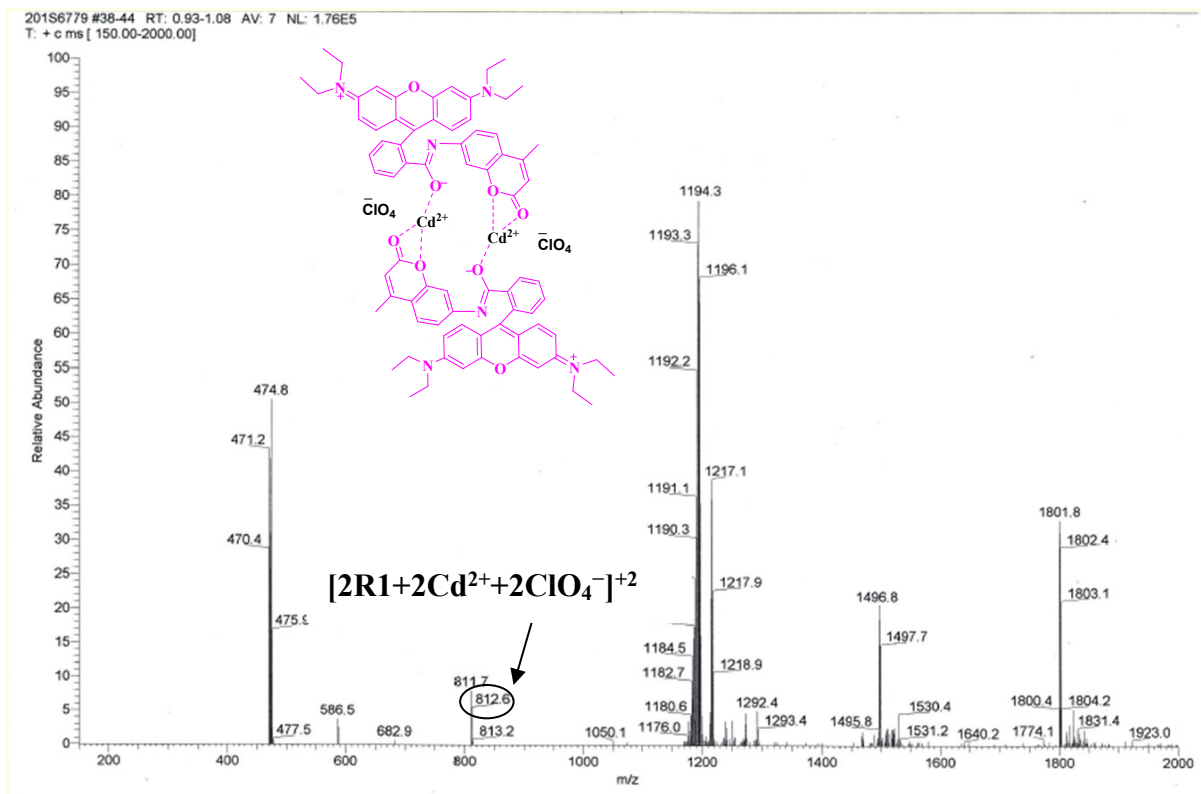

## LOD of R1 with Cd<sup>2+</sup>

The detection limit of **R1** with **Cd<sup>2+</sup>** was calculated on the basis of fluorescence titration data. To determine the standard deviation for the fluorescence intensity, the emission intensity of the individual receptors without any anion was measured by 10 times and the standard deviation of blank measurements was calculated.

The limit of detection (LOD) of the receptors for sensing **Cd<sup>2+</sup>** was determined from the following equation:

$$\text{LOD} = K \times \text{SD}/S$$

Where  $K = 2$  or  $3$  (we take  $3$  in this case);  $\text{SD}$  is the standard deviation of the blank receptor (**R1**) solution;  $S$  is the slope of the calibration curve.

From the linear fit graph we get slope  $1.54 \times 10^8$ , and  $\text{SD}$  value is  $0.52$ . Thus using the above formula we get the Limit of Detection =  $1.01 \times 10^{-8}$  M i.e. **R1** can detect **Cd<sup>2+</sup>** up to this very lower concentration by fluorescence techniques.

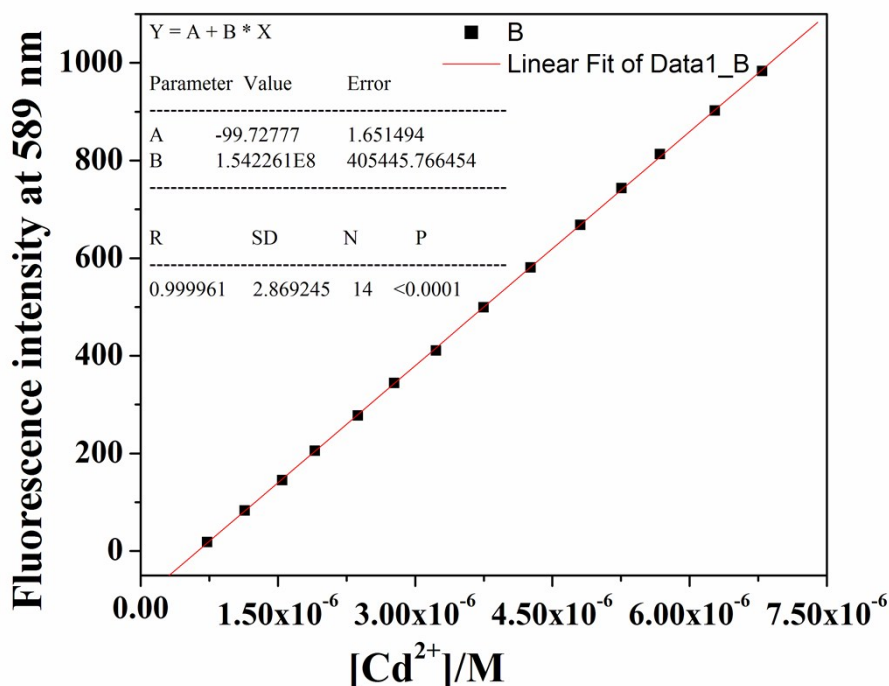

### Association constant calculation by Fluorescence titration method

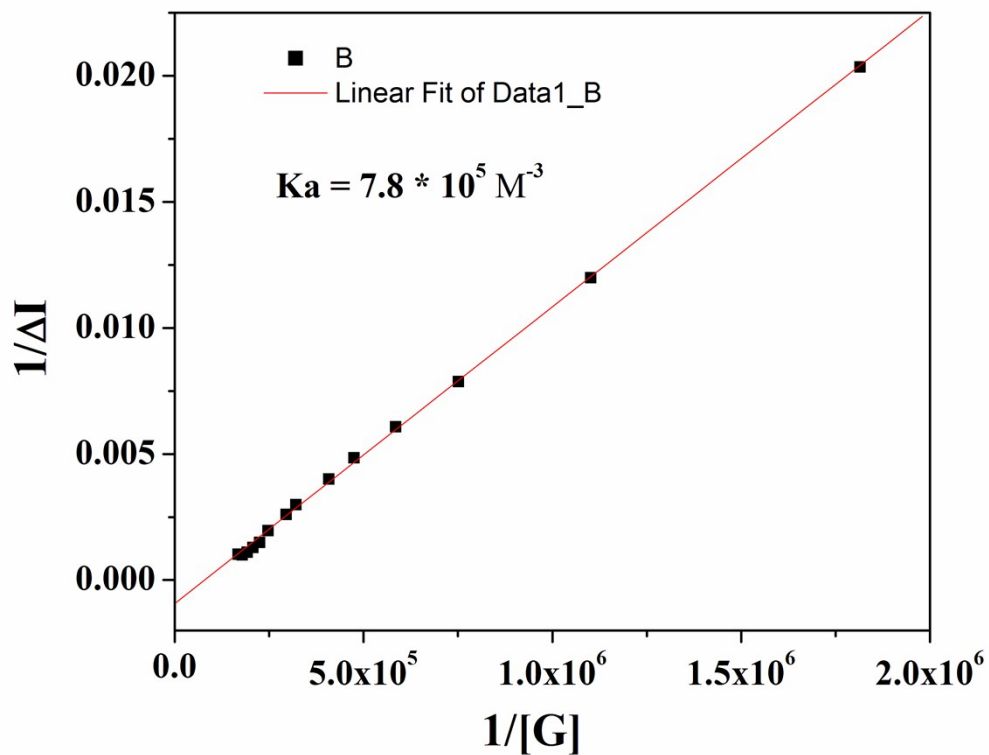

Association constant calculation by Fluorescence titration method of **R1** with  $Cd^{2+}$  using linear regression analysis.

### Quantum yield calculation:

Fluorescence quantum yields ( $\Phi$ ) were calculated using Equation given below (1) (Wu, D.; Huang, W.; Duan, C.; Lin, Z.; Meng, Q. *Inorg. Chem.* **2007**, *46*, 1538) using Rhodamine B ( $\Phi_f = 0.49$  in ethanol) as standards.

$$\Phi_u = \Phi_s \times \frac{I_u}{I_s} \times \frac{A_s}{A_u} \times \left( \frac{\eta_u}{\eta_s} \right)^2$$

Where  $\Phi_u$  and  $\Phi_s$  are the fluorescence quantum yields of the sample and standard,  $I_u$  and  $I_s$  are the integrated emission intensities of the sample and standard,  $A_u$  and  $A_s$  are the absorbance of the sample and standard at the excitation wavelength (560 nm), and  $\eta_u$  and  $\eta_s$  are the refractive indices of the sample and standard solutions, respectively.
